1 Are some commercial diets inadequate in essential nutrients? (long title)

2 Nutrient adequacy of commercial diets (short title)

3 Alan M. Preston<sup>1\*</sup>, Cindy A. Rodriguez<sup>2¶</sup>, Marianna M. Preston<sup>1¶</sup>

4 <sup>1</sup> Department of Biochemistry, University of Puerto Rico, Medical Sciences Campus, San Juan, Puerto Rico, United States  
5 of America

6  
7 <sup>2</sup>NutriEtiquetas, Franklin, Massachusetts, United States of America

8 \*Corresponding author

9 E-mail [alan.preston@upr.edu](mailto:alan.preston@upr.edu)

10 ¶These authors contributed equally to this work

11 Acknowledgments

12 The authors would like to thank Cristina Palacios, PhD - Florida International University, Miami, FL allowing use the NDSR  
13 program as part of her grant number 1R01HD098589-01. Permission to use her name was obtained.

14

15 Author Contributions

16 Alan M Preston contributed with: Conceptualization, Methodology, Validation, Formal Analysis, Investigation; Resources,  
 17 Data curation; and Writing – Original Draft Preparation.  
 18 Cindy A Rodriguez contributed with: Software, Validation and Formal Analysis.  
 19 Marianna M Preston contributed with: Software, Validation, Formal Analysis and Data Curation.  
 20 All authors critically reviewed and approved the final version of the manuscript submitted for publication.

21

22

23

24

25

## 26 Abstract

### 27 Background

28 Commercial manufacturers have formulated diets to promote not only weight reduction but also to reduce risks of  
 29 chronic diseases. The objective of this study is to determine if these formulations satisfy requirements for essential  
 30 nutrients.

### 31 Methods

32 We have selected two established commercial diets, one low fat, high carbohydrate (diet 1) and the other, high fat, low  
 33 carbohydrate (diet 2) and determined “representative meals” through use of recipes suggested in the manufacturer’s  
 34 manuals. Nutrition Data System for Research (NDSR) software has been used to perform the most extensive nutrient

analysis to date of these diets. Tables report macronutrients (energy), vitamins, minerals, essential amino acids, essential lipids and nutrient-related components for a total of 62 entries.

## Results

Diet 1 satisfied requirements for 50 of these (81%) with only vitamin B12, vitamin D, and essential fatty acids not reaching recommended levels, while fiber and glycemic load exceeded suggested values. Diet 2 satisfied requirements for 46 of the components (71%) but had excess percentage of fat, especially saturated fat, sodium and cholesterol as well as decreased percentage of carbohydrate resulting in suboptimal intake of B-complex vitamins (B1, niacin and total folate) as well as fiber.

## Conclusions

Neither diet satisfied adequacy for all reported nutrients. However, based on nutrient content alone diet 1, if supplemented or modified, could be sustained over the long term whereas diet 2 should not be encouraged for long term adaptation

## Introduction

In today's obesogenic environment, more Americans are using some form of weight-reduction diet than were they ten years ago [1]. The good news is that weight reduction diets do "work" at least in the short term. A recent publication reported that all of 14 commercial diets ended up with weight loss at 6 months accompanied by favorable health results [2]. This pattern of short term weight loss has been documented innumerable times by a multitude of investigators and summarized in several reviews [3-6], Nutrient composition of these diets varied widely among percent and types of carbohydrates, proteins, fats as well as micronutrients. The objective of our study is to determine if the manufacturers

of commercial diets have formulated recipes which provided recommended dietary levels of essential nutrients. To accomplish this, we have chosen two popular commercial diets and obtained representative examples of each with use of suggested meal plans and determined nutrient adequacy with the use of software programs.

58

## Materials and methods

### Software

The dietary analysis is extensive using the full power of the Nutrition Data System for Research (NDSR) software of which the 2019 version contains 174 nutrients, nutrient ratios and other food components [7]. Nutrients having dietary reference index's values (DRI's) [8] or recommended dietary allowances (RDA's) [9] will be reported. Other nutrients which can be biologically active but have no established recommendations such as phytochemicals found in plants in small amounts (polyphenolic flavonoids, carotenoids, etc. [10] and sugar alcohols, a class of polyols (sorbitol, mannitol, xylitol, etc.) which are present in varying levels in many fruits and vegetables [11] will not be reported. Likewise, non-essential amino acids and other non-essential nutrients found among the 174 entities in the NDSR will not be evaluated. Finally, some nutrient-related components (caffeine, glycemic load) will be reported making a total of 62 entries.

### Menus

We are using two established commercial diets, one is low fat, high carbohydrate, plant protein (Diet 1) [12]. This type of nutrient formulation is the basis for the Ornish, Macrobiotic and TLC diets, among others [13] although some incorporate animal protein. The other is high fat, low carbohydrate, mainly animal protein (Diet 2) [14]. This type of nutrient formulation is the basis for the Atkins, Paleo and Keto diets, among others. [13]. "Representative meals" were chosen through use of recipes suggested in the manufacturer's manuals [12, 14]. We have selected, using a random

75 numbers table, five of the 21 suggested daily menus from our designated commercial diet manuals which contain  
76 detailed content (ingredients and portion size) for breakfasts, lunches, dinners, and snacks. For clarification purposes, it  
77 should be noted that the diet manuals are structured differently. For diet 1, twenty one meal plans were listed in order  
78 (1 to 21). Therefore, the meal chosen by random numbers corresponds to the number in the list as shown in column 1,  
79 Table 1-top. For diet 2, twenty-one meal plans were listed but the order in which they were eaten was specified. (week  
80 and day). Therefore the meal chosen by random numbers corresponded to the specified week and day as shown in  
81 column 1, Table 1-bottom. Thumb-nail sketches of both diets are presented in table 1 to portray typical menus. Results  
82 of the five meals are averaged (representative meal) and reported in tables 2-6.

**Table 1. Menus for Diets**

**Diet 1\* Indicating [meal number] from diet manual.**

| Menu           | Breakfast                              | Lunch                                                     | Dinner                                                   |
|----------------|----------------------------------------|-----------------------------------------------------------|----------------------------------------------------------|
| Menu 1<br>[13] | Honeydew, Toasted<br>bread with spread | Brown rice<br>Squash, Apples<br>Cauliflower               | Vegetable platter<br>Sweet potato<br>Corn bread, Sherbet |
| Menu 2<br>[8]  | Granola, Yogurt<br>Orange juice        | Fruit salad<br>Bread-pudding                              | Spaghetti, tufu<br>Cucumber salad,<br>fruit-ice          |
| Menu 3<br>[21] | Grains mussili<br>Grapefruit           | Zucchini, Spinach<br>Eggplant<br>Citrus salad             | Crudite salad<br>Bulgar- pilof<br>Apple crisps           |
| Menu 4<br>[18] | 7 grain cereal<br>Orange juice         | Cauliflower -<br>salad, Raison-breadfruit,<br>Carrot soup | Brussel sprouts<br>Green salad<br>Raspberry ice          |
| Menu 5<br>[14] | Fruit coffee cake<br>Orange juice      | Cucumber-yogurt<br>soup, Sherbert                         | Eggplant, Brown rice, Green salad<br>Cantaloupe          |

\*No Snacks or Supplement.

**Diet 2\* Indicating Week and day from diet manual (first column).**

| Menu               | Breakfast                            | Lunch              | Dinner                         | Snack                           |
|--------------------|--------------------------------------|--------------------|--------------------------------|---------------------------------|
| Menu 1<br>Wk 1 M   | Cheesy bacon<br>Egg muffin<br>Coffee | Chicken<br>salad   | Beef stroganoff<br>Cauliflower | Cheese cubes<br>Hard boiled egg |
| Menu 2<br>Wk 1 F   | Keto smoothie<br>Coffee              | Chicken<br>salad   | Beef stroganoff                | Macadamia nuts<br>Cheese crisps |
| Menu 3<br>Wk 2 Th  | "Noats" coffee                       | Greek<br>salad     | Cheese tacos                   | Keto sno-cone<br>Carnitas       |
| Menu 4<br>Wk 2 Sun | Coffee                               | Pancakes           | Beef broccoli                  | Keto muffins                    |
| Menu 5<br>Wk 3 F   | Coffee                               | Bacon egg<br>salad | Chicken pizza                  | none                            |

## 84    **Statistics**

85    A random numbers table (non-repeat) was used to select meals. Nutrient results from the NDSR software were recorded  
 86    as meal content of five selected recipes from the manufacturer's manuals for diets 1 and 2. The average and standard  
 87    deviations for nutrients were calculated and compared to recommended guidelines.

## 88    **Results**

89    A word on the manner of data presentation: When possible, we use RDA's which are the daily dietary intake levels of  
 90    nutrients considered sufficient by the Food and Nutrition Board of the Institute of Medicine to meet the requirements of  
 91    97.5% of healthy individuals in each life-stage and sex groups (10). Because of limited space, the RDA values listed will be  
 92    for adult males; females have slightly lower values. In a few instances, reference values will be expresses as adequate  
 93    intake (AI), defined as recommended average daily nutrient intake (9). Importantly, there is no RDA for energy (caloric  
 94    intake) which depends on a myriad of individual factors. Consequently, energy and macronutrient content will be  
 95    expressed as DRI values which give a rough idea of how much energy a person should be eating each day, and how much  
 96    fat, sugar, salt and so on being based on an average-sized adult doing an average amount of physical activity. DRI values  
 97    for energy have been set at 2000 Kcal for men and 1800 Kcal for women [9].

98

99

100

101

102

Table 2 Macronutrients

| Diet 1            |          |          |          |          |          |                 | Diet 2 |          |          |          |        |        |                  |
|-------------------|----------|----------|----------|----------|----------|-----------------|--------|----------|----------|----------|--------|--------|------------------|
| Content (units)   | Meal 1   | Meal 2   | Meal 3   | Meal 4   | Meal 5   | Mean ± SD       | DRI    | Meal 1   | Meal 2   | Meal 3   | Meal 4 | Meal 5 | Mean ± SD        |
| Energy KCAL       | 2,212.41 | 1,858.16 | 2,147.73 | 1,794.38 | 1,325.81 | 1867.7 ± 315.07 | 2000   | 1,736.49 | 2,288.84 | 1,404.57 | 900.65 | 845.31 | 1435.17 ± 539.28 |
| Total fat gm      | 42.88    | 64.20    | 38.46    | 55.32    | 35.54    | 47.28 ± 10.82   | ≤70    | 132.74   | 161.69   | 115.87   | 74.78  | 70.15  | 111.05 ± 34.78   |
| Fat calories %    | 17.44    | 31.10    | 16.12    | 27.74    | 24.13    | 23.31 ± 5.78    | 25-30  | 68.80    | 63.58    | 74.24    | 74.73  | 74.69  | 71.21 ± 4.42     |
| Total carbs gm    | 406.46   | 300.67   | 396.20   | 295.50   | 238.46   | 327.46 ± 64.23  | 260    | 26.76    | 66.40    | 34.17    | 25.60  | 15.10  | 33.61 ± 17.49    |
| Carb calories %   | 73.49    | 64.72    | 73.79    | 65.87    | 71.94    | 69.96 ± 3.88    | 45-65  | 6.16     | 11.60    | 9.73     | 11.37  | 7.15   | 9.2 ± 2.2        |
| Total prot gm     | 87.12    | 45.33    | 71.92    | 59.64    | 37.18    | 60.24 ± 17.96   | 56     | 111.04   | 153.97   | 68.08    | 38.19  | 44.00  | 83.06 ± 43.76    |
| Prot calories %   | 15.75    | 9.76     | 13.39    | 13.30    | 11.22    | 12.68 ± 2.05    | 10-35  | 25.58    | 26.91    | 19.39    | 16.96  | 20.82  | 21.93 ± 3.75     |
| Animal prot gm    | 7.91     | 3.93     | 11.12    | 5.31     | 5.12     | 6.68 ± 2.57     | *      | 104.06   | 135.03   | 46.40    | 29.82  | 35.41  | 70.14 ± 41.85    |
| Animal prot %     | 9.08     | 8.68     | 15.46    | 8.91     | 13.76    | 11.18 ± 2.86    | *      | 93.72    | 87.70    | 68.15    | 78.07  | 80.47  | 81.62 ± 8.7      |
| Vegetable prot gm | 79.21    | 41.40    | 60.80    | 54.33    | 32.07    | 53.56 ± 16.25   | *      | 6.98     | 18.94    | 21.69    | 8.38   | 8.59   | 12.91 ± 6.13     |
| Vegetable prot %  | 90.92    | 91.32    | 84.54    | 91.09    | 86.24    | 88.82 ± 2.86    | *      | 6.28     | 12.30    | 31.85    | 21.93  | 19.53  | 18.38 ± 8.7      |
| Alcohol gm        | 1.39     | 0.05     | 0.77     | 0.38     | 0.61     | 0.64 ± 0.45     | ‡      | -        | -        | 0.00     | 0.09   | -      | 0.02 ± 0.04      |
| Alcohol cal%      | 0.00     | 0.00     | 0.00     | 0.00     | 0.00     | 0 ± 0           | ‡      | 0.00     | 0.00     | 0.00     | 0.01   | 0.00   | 0 ± 0            |
| Total SFA gm      | 5.94     | 5.58     | 3.79     | 4.89     | 3.44     | 4.73 ± 0.98     | ≤15    | 64.76    | 86.66    | 46.14    | 31.66  | 26.96  | 51.23 ± 22.07    |
| SFA cal %         | 2.42     | 2.70     | 1.59     | 2.45     | 2.33     | 2.3 ± 0.38      | ≤7     | 33.57    | 34.07    | 29.56    | 31.63  | 28.70  | 31.51 ± 2.12     |
| Total MUFA gm     | 8.63     | 9.72     | 6.16     | 8.20     | 6.03     | 7.75 ± 1.44     | ≤44    | 41.86    | 45.81    | 36.86    | 26.98  | 25.09  | 35.32 ± 8.12     |
| MUFA cal %        | 3.51     | 4.71     | 2.58     | 4.11     | 4.09     | 3.8 ± 0.72      | ≤20    | 21.70    | 18.01    | 23.62    | 26.96  | 26.71  | 23.4 ± 3.33      |
| Total PUFA gm     | 22.89    | 44.35    | 24.47    | 35.94    | 22.74    | 30.08 ± 8.66    | ≤22    | 13.49    | 14.62    | 23.40    | 9.59   | 12.67  | 14.75 ± 4.64     |
| PUFA cal %        | 9.31     | 21.48    | 10.25    | 18.03    | 15.44    | 14.9 ± 4.61     | ≤10    | 6.99     | 5.75     | 14.99    | 9.58   | 13.48  | 10.16 ± 3.58     |
| Total Trans FA gm | 0.06     | 0.23     | 0.12     | 0.18     | 0.11     | 0.14 ± 0.06     | ≤2     | 3.24     | 3.08     | 2.11     | 1.37   | 0.93   | 2.14 ± 0.91      |
| Trans FA cal %    | 0.03     | 0.11     | 0.05     | 0.09     | 0.07     | 0.07 ± 0.03     | ≤1     | 1.68     | 1.21     | 1.35     | 1.36   | 0.99   | 1.32 ± 0.23      |
| Total sugar gm    | 42.19    | 23.45    | 31.05    | 26.61    | 17.46    | 28.15 ± 8.3     | 40     | 0.82     | 2.24     | 1.85     | 2.62   | 1.50   | 1.8 ± 0.62       |
| Added sugar gm    | 22.96    | 5.86     | 4.16     | 14.32    | 6.02     | 10.66 ± 7.09    | 38     | 0.43     | 0.35     | 0.56     | 2.02   | 0.11   | 0.69 ± 0.68      |
| Total fiber gm    | 63.83    | 45.69    | 48.05    | 59.22    | 42.48    | 51.85 ± 8.22    | 25-35  | 9.89     | 23.03    | 16.05    | 6.81   | 6.71   | 12.5 ± 6.27      |
| Water gm          | 3,085    | 1,754    | 2,128    | 2,197    | 1,748    | 2182.6 ± 487.95 | 1811 P | 3,014    | 3,275    | 3,365    | 2,851  | 1,639  | 2828.75 ± 622.28 |

\* No DRI

‡ No recommendation dietary guideline for American (9) suggest moderate intake 2 drinks per day for Men / 1 drink per day for Women. (Drink = 12 oz beer or 5 oz wine)

P 8 Glasses x8 ounces = 64 oz of water (9)

Table 3 Vitamins

| Diet 1                      |          |          |          |          |          |                  | Diet 2 |          |          |          |        |        |                 |
|-----------------------------|----------|----------|----------|----------|----------|------------------|--------|----------|----------|----------|--------|--------|-----------------|
| Content (units)             | Meal 1   | Meal 2   | Meal 3   | Meal 4   | Meal 5   | Mean ± SD        | RDA    | Meal 1   | Meal 2   | Meal 3   | Meal 4 | Meal 5 | Mean ± SD       |
| Vit A (retinol) mcg         | 2,479.35 | 6,487.85 | 1,576.50 | 3,852.78 | 1,914.54 | 3262.2 ± 1790.21 | 900    | 1,743.97 | 2,134.18 | 1,023.26 | 364.34 | 942.72 | 1241.7 ± 625.41 |
| Vit D (cholecalciferol) mcg | 0.20     | -        | 0.02     | 0.02     | -        | 0.05 ± 0.08      | 10-20  | 5.75     | 5.46     | 3.92     | 1.99   | 2.84   | 3.99 ± 1.46     |
| Vit E (y tocopherol) mg     | 26.35    | 26.31    | 14.20    | 23.43    | 15.13    | 21.08 ± 5.36     | 15     | 4.53     | 14.73    | 11.44    | 10.01  | 7.10   | 9.56 ± 3.52     |
| Vit K mcg                   | 285.98   | 530.54   | 146.44   | 730.32   | 388.17   | 416.29 ± 201.13  | 120 AI | 152.92   | 604.81   | 157.28   | 54.27  | 65.38  | 206.93 ± 203.49 |
| Vit C mg                    | 414.41   | 355.74   | 356.51   | 419.72   | 224.69   | 354.21 ± 70.28   | 90     | 108.57   | 397.22   | 16.93    | 28.47  | 21.58  | 114.55 ± 145.27 |
| Vit B1 mg                   | 2.92     | 2.02     | 2.16     | 2.14     | 1.26     | 2.1 ± 0.53       | 1.2    | 0.59     | 0.83     | 1.24     | 0.23   | 0.46   | 0.67 ± 0.34     |
| Vit B2 mg                   | 2.15     | 1.65     | 1.63     | 1.70     | 1.08     | 1.64 ± 0.34      | 1.30   | 2.38     | 2.73     | 2.00     | 0.95   | 1.13   | 1.84 ± 0.69     |
| Niacin mg                   | 28.06    | 19.49    | 21.66    | 17.14    | 11.11    | 19.49 ± 5.55     | 16     | 15.01    | 16.78    | 11.49    | 7.82   | 5.59   | 11.34 ± 4.21    |
| Pantothenic acid mg         | 8.70     | 7.74     | 8.12     | 7.88     | 5.20     | 7.53 ± 1.21      | 5 AI   | 7.31     | 9.10     | 3.79     | 2.30   | 2.75   | 5.05 ± 2.68     |
| Vit B6 mg                   | 3.81     | 3.00     | 2.06     | 2.97     | 1.97     | 2.76 ± 0.68      | 1.3    | 1.61     | 2.32     | 1.08     | 0.74   | 0.50   | 1.25 ± 0.65     |
| Total folate mcg            | 855.15   | 600.87   | 593.01   | 829.14   | 373.22   | 650.28 ± 176.89  | 400    | 324.19   | 573.55   | 178.12   | 88.73  | 148.05 | 262.53 ± 173.77 |
| Vit B12 mcg                 | 1.90     | 0.42     | 1.47     | 0.69     | 0.54     | 1 ± 0.58         | 2.4    | 5.06     | 5.21     | 3.11     | 1.74   | 1.64   | 3.35 ± 1.55     |

Table 4 Minerals

| Diet 1          |          |          |          |          |          |                   | Diet 2 |          |          |          |          |          |                   |
|-----------------|----------|----------|----------|----------|----------|-------------------|--------|----------|----------|----------|----------|----------|-------------------|
| Content (units) | Meal 1   | Meal 2   | Meal 3   | Meal 4   | Meal 5   | Mean ± SD         | RDA    | Meal 1   | Meal 2   | Meal 3   | Meal 4   | Meal 5   | Mean ± SD         |
| Calcium mg      | 1,275.19 | 604.36   | 841.54   | 794.88   | 578.56   | 818.91 ± 250.23   | 1000   | 760.26   | 1,818.96 | 1,164.94 | 377.51   | 472.28   | 918.79 ± 526.95   |
| Phosphorous mg  | 2,126.66 | 1,159.89 | 1,485.69 | 1,349.59 | 1,026.99 | 1429.76 ± 382.17  | 700    | 1,134.73 | 1,764.05 | 1,504.68 | 530.56   | 763.95   | 1139.6 ± 455.04   |
| Magnesium mg    | 796.39   | 491.30   | 497.90   | 506.37   | 423.58   | 543.11 ± 130.01   | 310    | 354.07   | 506.09   | 637.05   | 377.41   | 411.24   | 457.17 ± 103.78   |
| Iron mg         | 23.19    | 13.56    | 13.73    | 14.02    | 11.52    | 15.21 ± 4.09      | 8      | 6.77     | 10.67    | 11.24    | 4.49     | 3.93     | 7.42 ± 3.04       |
| Zinc mg         | 17.96    | 8.32     | 10.00    | 9.25     | 8.13     | 10.73 ± 3.68      | 11     | 11.37    | 14.70    | 12.31    | 6.26     | 4.90     | 9.91 ± 3.72       |
| Copper mg       | 3.51     | 1.86     | 2.21     | 2.20     | 1.57     | 2.27 ± 0.66       | 0.9    | 0.67     | 1.25     | 1.54     | 0.71     | 0.87     | 1.01 ± 0.33       |
| Selenium mcg    | 138.28   | 79.85    | 118.31   | 88.61    | 41.06    | 93.22 ± 33.41     | 55     | 132.67   | 133.96   | 78.57    | 44.07    | 596.68   | 197.19 ± 202.62   |
| Sodium mg       | 440.53   | 384.99   | 399.06   | 442.86   | 211.24   | 375.74 ± 85.32    | 1500   | 4,914.97 | 7,342.25 | 4,041.47 | 5,132.50 | 5,034.59 | 5293.16 ± 1095.55 |
| Potassium mg    | 7,461.92 | 5,065.32 | 4,433.99 | 5,005.98 | 4,085.53 | 5210.55 ± 1183.24 | 4700   | 4,117.21 | 5,593.91 | 4,083.22 | 3,274.73 | 3,184.26 | 4050.67 ± 864.85  |
| Manganese mg    | 18.42    | 7.86     | 8.79     | 9.00     | 6.67     | 10.15 ± 4.22      | 1.8    | 0.79     | 1.93     | 3.98     | 1.32     | 0.91     | 1.79 ± 1.17       |

Table 5 Essential Amino Acids and Essential Fatty Acids

| Diet 1                         |         |         |         |         |         |                 | Diet 2 |         |          |         |         |         |                 |
|--------------------------------|---------|---------|---------|---------|---------|-----------------|--------|---------|----------|---------|---------|---------|-----------------|
| Content (units)                | Meal 1  | Meal 2  | Meal 3  | Meal 4  | Meal 5  | Mean ± SD       | RDA    | Meal 1  | Meal 2   | Meal 3  | Meal 4  | Meal 5  | Mean ± SD       |
| Histidine mg                   | 2,010.0 | 1,034.0 | 1,583.0 | 1,364.0 | 812.0   | 1360.6 ± 419.2  | 14     | 2,607.0 | 3,757.0  | 2,099.0 | 1,108.0 | 1,282.0 | 2170.6 ± 962.4  |
| Isoleucine mg                  | 3,300.0 | 1,696.0 | 2,780.0 | 2,268.0 | 1,404.0 | 2289.6 ± 692.6  | 19     | 4,317.0 | 6,268.0  | 3,060.0 | 1,692.0 | 2,120.0 | 3491.4 ± 1655   |
| Leucine mg                     | 5,941.0 | 3,159.0 | 4,992.0 | 3,712.0 | 2,427.0 | 4046.2 ± 1265.3 | 42     | 7,999.0 | 11,748.0 | 5,299.0 | 2,989.0 | 3,606.0 | 6328.2 ± 3218.3 |
| Lysine mg                      | 4,039.0 | 2,243.0 | 2,901.0 | 2,916.0 | 1,914.0 | 2802.6 ± 728.6  | 38     | 7,330.0 | 10,950.0 | 4,267.0 | 2,694.0 | 3,121.0 | 5672.4 ± 3097   |
| Methionine mg                  | 1,296.0 | 758.0   | 1,206.0 | 833.0   | 585.0   | 935.6 ± 271.3   | 19     | 2,354.0 | 3,144.0  | 1,599.0 | 896.0   | 1,365.0 | 1871.6 ± 791.8  |
| Phenylalanine mg               | 3,826.0 | 2,138.0 | 3,402.0 | 2,475.0 | 1,628.0 | 2693.8 ± 809.5  | 33.0   | 4,416.0 | 6,168.0  | 3,025.0 | 1,705.0 | 2,075.0 | 3477.8 ± 1639.1 |
| Tryptophane mg                 | 987.0   | 550.0   | 762.0   | 654.0   | 433.0   | 677.2 ± 189.5   | 20     | 1,052.0 | 1,764.0  | 987.0   | 326.0   | 548.0   | 935.4 ± 494.8   |
| Tyrosine mg                    | 2,605.0 | 1,286.0 | 2,051.0 | 1,585.0 | 1,116.0 | 1728.6 ± 541.1  | 5      | 3,622.0 | 5,068.0  | 2,535.0 | 1,241.0 | 1,715.0 | 2836.2 ± 1377.7 |
| Valine mg                      | 4,037.0 | 2,284.0 | 3,488.0 | 2,848.0 | 1,878.0 | 2907 ± 782.9    | 24     | 5,401.0 | 7,763.0  | 3,672.0 | 1,915.0 | 2,405.0 | 4231.2 ± 2138   |
| Alpha linolenic acid (ALA) mg  | 1,261.0 | 1,101.0 | 561.0   | 728.0   | 640.0   | 858.2 ± 273.5   | 1600   | 1,522.0 | 1,909.0  | 4,809.0 | 271.0   | 277.0   | 1757.6 ± 1660.8 |
| Eicosapantanaeic acid (EPA) mg | -       | -       | -       | -       | -       | 0 ± 0           | †      | 27.0    | 20.0     | 14.0    | 8.0     | 12.0    | 16.2 ± 6.6      |
| Docosahexaeonic acid (DHA) mg  | -       | -       | -       | -       | -       | 0 ± 0           | †      | 60.0    | 37.0     | 2.0     | 17.0    | 44.0    | 32 ± 20.4       |

\*Arginine is conditional  
† EPA + DHA = 250-500 mg/day (17)

Table 6 Nutrient-Related Components

| Diet 1          |        |        |        |        |        |                | Diet 2   |        |        |        |        |        |                 |
|-----------------|--------|--------|--------|--------|--------|----------------|----------|--------|--------|--------|--------|--------|-----------------|
| Content (units) | Meal 1 | Meal 2 | Meal 3 | Meal 4 | Meal 5 | Mean ± SD      | DRI      | Meal 1 | Meal 2 | Meal 3 | Meal 4 | Meal 5 | Mean ± SD       |
| Cholesterol mg  | 2.74   | 1.37   | 3.88   | 1.84   | 1.78   | 2.32 ± 0.9     | ≤ 300 mg | 934.13 | 712.80 | 256.86 | 296.71 | 477.77 | 535.65 ± 256.26 |
| Caffeine mg     | -      | -      | -      | -      | -      | 0 ± 0          | *        | 189.44 | 100.90 | 189.53 | 94.81  | 94.72  | 133.88 ± 45.46  |
| Glycemic load   | 171.72 | 144.54 | 177.28 | 103.86 | 92.80  | 138.04 ± 34.44 | †        | 7.16   | 17.80  | 7.13   | 6.00   | 2.61   | 8.14 ± 5.11     |

\* ≤ 400 mg (16)  
† Glycemic Load (or GL) combines both the quantity and quality of carbohydrates .  
Low GL is between 1 and 10; a moderate GL is 11 to 19; and a high GL is 20 or higher (18).

126 It can be seen that the sum of percentages of fat, carbohydrate and fat calories slightly exceeds the total Kcal in line 1,  
127 table 2 for both diets. This is due to the fact that calories from foods in the NDSR are determined chemically where  
128 energy values vary [19] whereas our calculations use standard values set for carbohydrates, protein and for fat of 4,4  
129 and 9 Kcal/gm respectively.

130 There was moderate agreement in consistency of nutrient composition for most meals for diet 1, with a maximum  
131 difference of 900 Kcal between highest and lowest caloric ingestion, however, diet 2 had less agreement with a  
132 maximum difference of 9000 Kcal/gm. This caloric difference resulted in meal to meal variations of all other nutrients in  
133 the tables.

134 Of the 62 nutrients and nutrient- like components reported, fifty one (81%) achieved or fell within reference ranges for  
135 diet 1 and forty six (71%) for diet 2. Components outside reference ranges, both below and above include Diet 1: Table 2  
136 (gm carbohydrate, %carbohydrate, fiber-all high), Table 3 (vitamin D, vitamin B12 –both low), Table 4 (sodium- low),  
137 Table 5 (essential fatty acids all low), Table 6 (cholesterol-low, glycemic load-high). For diet 2: Table 2 (gm fat and % fat,  
138 especially saturated fat-all too high, gm carbohydrate and % carbohydrate, fiber-all too low), Table 3 (Vitamin D, Vitamin  
139 B1, niacin, total folate-all too low, vitamin E-slightly low), Table 4 (sodium-too high), Table 5 (EPA, DHA-low), Table 6  
140 (cholesterol-high).

141 The following discussion section will include comments on the enumeration of these outliers.

## 142 **Discussion**

143 Diet manufacturers often shuffle proportions and types of carbohydrates, fats and proteins to create eating plans  
144 concomitant with reducing risk of major degenerative diseases commonly found in the United States [13]. Diet 1 having  
145 low fat, high carbohydrate and plant-based protein, which the manufacturer refers to as “heart friendly”, incorporates  
146 nutrients associated with favorable cardiovascular function [20]. These include high fiber, no animal protein as well as

low fat (especially saturated fat), low sodium and cholesterol and little added sugar. As a consequence, the aberrant values in the tables for fiber, sodium and cholesterol are a result of conscious action of the manufacturer's design of the diet. One of the most consistent results in table 2 is percent carbohydrate (about 70%) which is probably the most important ingredient in the diet's formulation and used as a set point. In doing this, other components may be left short of achieving reference values. The absence of animal protein would account for low vitamin B12 which is exclusively formed in animals and probably the low vitamin D result since dairy products, a principle source of this vitamin, are minimized. The low amount of fat could account for diminished levels of alpha linolenic acid, especially for EPA and DHA (which measured zero) as well as for vitamin D. Finally, there is the issue of high glycemic load. Whether this is a matter of concern depends on the form of carbohydrate present [18]. Referring to Table 2, added sugar which has unfavorable circumstances on blood sugar is twofold below levels associated with risk while fiber which mitigates the rise in blood sugar is twice the recommended level thus concern of high glycemic load should be minimized.

Diet 2 which is high fat, low carbohydrate and moderate protein is claimed by the manufacturer to be "fat burning" since very low carbohydrate intake (20 -35 gm/day at the start of the diet) triggers mobilization of lipid stores stimulating formation of ketone bodies which can have beside weight loss, therapeutic benefits such as reducing risk of insulin resistance and type 2 diabetes [21].

It should be mentioned at this point that our paper solely evaluates nutrient adequacy of the two diets and makes no judgment of manufacturer's health claims. Diet 2 has been formulated to promote ketogenic metabolism [14]. This is accomplished by high fat content and very low amount of carbohydrate. Consequently, the aberrations in the results section for total fat, percent fat, total saturated fat, percent saturated fat, total carbohydrates and percent carbohydrates are intentionally made by the manufacturer. End results of this formulation are high dietary cholesterol and diminished intake of B-complex vitamins (Vitamin B1, niacin, total folate) and fiber which are all associated with carbohydrate content. An additional effect of low amount of carbohydrate is loss of body water. To prevent dehydration and electrolyte imbalance, at least eight glasses of water, 8 oz each are recommended accompanied by at least 4000 mg

170 sodium (well above the DRI), 3000 mg potassium and 400 mg magnesium [15].. Since the amount of fat and animal  
171 protein are in abundance, one would not expect reduced levels of fat soluble vitamins or essential fatty acids as reported  
172 in tables 3 and 5.. A possible explanation is that the 5 meals selected missed menus that included seafood products of  
173 which several were included in the recipe manual.

174 Strengths of this study include the manner of data entry and diet analysis. Many dietary studies examine the amount of  
175 nutrients consumed by individuals which is susceptible to recall errors. Here we have exact ingredients and portion  
176 sizes, copied directly from the recipe books. In addition, using the full capacity of the NDSR software, we are able to  
177 perform the most extensive analyses of commercial weight loss diets to date.

178 Potential weaknesses include estimated intake of minor nutrients and determination of a “representative meal.” The  
179 number of days to validate intake of nutrients has been established using food frequency questionnaires (ffq’s), the  
180 results of which vary widely. Macronutrients (found in table 2) can be validated within a week, while some  
181 micronutrients (tables 3 and 4) may take a month or more [22]. In regard to “reference meal”, determination was made  
182 using the average of 5 meals, selected at random from the 21 daily meals in the diet manuals. Even though recipes are  
183 formulated to produce a relatively consistent meal content, there is still a variation of 900 Kcal between highest and  
184 lowest meal energies for diet 1 and 9000 Kcal for diet 2. A “true meal” would require analysis of all 21 meals in the diet  
185 manual, however, we believe this result would not differ substantially from our estimate and conclusions remain valid.  
186 Although as mentioned previously in the results section, all reference values in the tables are based solely on those of  
187 adult men and would not necessarily apply for women or children.

188 Finally, returning to the question posed in the title of this manuscript: “Are some commercial diets inadequate in  
189 essential nutrients?” The answer (in this case) is “yes” For diet 1, the formulation of macronutrients resulted in  
190 suboptimal ingestion of animal protein causing a deficiency of vitamin B12 and vitamin D, and the low fat also restricted  
191 vitamin D intake as well as reducing essential fatty acid content. The high level of fiber could furthermore compromise

192 absorption of minerals [23]. Overall, diet 1 or eating patterns of similar composition should be “safe” over a long term if  
 193 accompanied with a vitamin/mineral/essential fatty acid supplement or if modified from only plant protein to one  
 194 incorporating some meat and seafood. For diet 2 the formulation of macronutrients resulted in excess amount of fat  
 195 and fat associated nutrients as well as an insufficiency of carbohydrate and carbohydrate associated nutrients. To  
 196 comply with DRI/RDA recommendations the formulation of diet 2 would have to be modified, reducing fat and  
 197 increasing carbohydrate. This alteration however would defeat the ketogenic metabolic scheme and its purpose.  
 198 Overall, diet 2 or eating patterns of a similar composition would be unsafe over the long term.

## 199 Conclusions

200 Although the two commercial weight reduction diets we have chosen differ greatly in composition and have been  
 201 formulated to promote dissimilar modes of action to reducing risk for chronic diseases, they both satisfy  
 202 recommendations for most nutrients, being 81% for diet 1 and 71% for diet 2. The manner in which they differ is that  
 203 diet 1 is sustainable over time if supplemented or modified whereas diet 2 is not sustainable over time due to nutritional  
 204 imbalances and should not be continued.

205

## 206     References

207     1. Stierman B, Ansai N, Mishra S, et al.. (2020) Special diets among adults: United  
208     States, 2015–2018. NCHS Data Brief, no 389. Hyattsville, MD: National Center for  
209     Health Statistics.

210     bioRxiv preprint doi: <https://doi.org/10.1101/2021.03.31.437852>; this version posted March 31, 2021. The copyright holder for this preprint (which was not certified by peer review) is the author/funder, who has granted bioRxiv a license to display the preprint in perpetuity. It is made available under a [CC-BY 4.0 International license](#).

211     2 .Long GE. Sadeghirad B, Ball GCD, et al. (2020) Comparison of dietary  
212     macronutrient patterns of 14 popular named dietary programmes for weight and  
213     cardiovascular risk factor reduction in adults: systematic review and network  
214     meta-analysis of randomised trials. BMJ ;369:m696

215     3 .Tsai AG, Wadden TA (2005). Systematic Review: An Evaluation of Major  
216     Commercial Weight Loss Programs in the United States Ann Intern Med;142:56-  
217     66.

218     4. Johnston BC, Kanters S, Bandayrel K, et al. (2014) Comparison of weight loss  
219     among named diet programs in overweight and obese adults: a meta-analysis.  
220     JAMA;312:923-33. 10.1001/jama.2014.10397.

221     5. Gudzone KA, Doshi RS, Mehta AK, et al.(2015). Efficacy of commercial weight-  
222     loss programs: an updated systematic review. Ann Intern Med.;162(7):501-512.  
223     doi:10.7326/M14-2238.

224     .6 Anton SD, Hida A, Heekin K, et al.(2017). Effects of popular diets without  
225     specific calorie targets on weight loss outcomes: systematic review of findings  
226     from clinical trials. Nutrients ;9:822. 10.3390/nu9080822. [PMCID: PMC5579615]

227     7.. Harnack L. (2013) Nutrition Data System for Research (NDSR). In: Gellman  
228     M.D., Turner J.R. (eds) Encyclopedia of Behavioral Medicine. Springer, New York,  
229     NY.

230     8... Institute of Medicine. (2006). Dietary Reference Intakes: The Essential Guide  
231     to Nutrient Requirements. Washington, DC: The National Academies Press.

232 9. National Research Council (US) Subcommittee on the Recommended Dietary  
233 Allowances. Recommended Dietary Allowances: 10th Edition. (1989). Washington  
234 (DC): National Academies Press .

235 10. Rice T, Zannini E, K Arendt E, et al.(2019). A review of polyols –  
236 biotechnological production, food applications, regulation, labeling and health  
237 effects [published online ahead of print. Crit Rev Food Sci Nutr. 2019;1–18.

238 bioRxiv preprint doi: <https://doi.org/10.1101/2021.03.31.437882>; this version posted March 31, 2021. The copyright holder for this preprint (which was not certified by peer review) is the author/funder, who has granted bioRxiv a license to display the preprint in perpetuity. It is made available under a CC-BY 4.0 International license.

239 11. Dreosti IE.(2000). Recommended dietary intake levels for phytochemicals:  
240 Feasible or fanciful?. Asia Pac J Clin Nutr.;9 Suppl 1:S119–S122.  
241 doi:10.1046/j.1440-6047.2000.00167.x

242 12 Ornish D. (1982). Stress, diet and your heart. New York, NY. Holt, Rineheart  
243 and Winston..

244 13.. <https://health.usnews.com/best-diet/best-diets-overall>.

245 14. Gregory R. (2018). 21-day ketogenic diet weight loss challenge. Emeryville,  
246 CA. Rockridge Press..

247 15 . Paoli A, Rubini A, Volek JS, et al. (2013). Beyond weight loss: a review of the  
248 therapeutic uses of very-low-carbohydrate (ketogenic) diets. Eur J Clin  
249 Nutr.67:789-96. doi: 10.1038/ejcn.2013.116.

250 16 U.S. Department of Health and Human Services and U.S. Department of  
251 Agriculture.(2015). 2015 – 2020 Dietary Guidelines for Americans. 8th Edition.

252 17. Simopoulos AP, Leaf A, Salem N Jr. (2000). Workshop statement on the  
253 essentiality of and recommended dietary intakes for Omega-6 and Omega-3 fatty  
254 acids. Prostaglandins Leukot Essent Fatty Acids.;63(3):119-121..

255 18. Jenkins DJA, Kendall CWC, Augustini LSA, et al. (2002) Glycemic index:  
256 overview of implications in health and Disease. Amer J Clin Nutr; 76 (1): 266S-  
257 273S.

- 258 19. Merrill AL, Watt BK. Energy of foods. (1973) Human Nutrition Research  
259 Board, United States Department of Agriculture, Handbook No 74, US  
260 Government Printing Office, Washington, DC 20402.
- 261 20. Hu FB, Willett WC.(2002). Optimal Diets for Prevention of Coronary Heart  
262 Disease. JAMA. ;288(20):2569-2578.doi:10.1001/jama.288.20.2569.
- 263 21. Azar ST (2016) Benefit of Ketogenic Diet For Management of Type Two  
264 Diabetes: A Review. J Obes Eat Disord 2: 2. doi:10.4172/2471-8203.10002.
- 265 22. Nelson M,, Black AE, Morris, JA, et al.(1989), Between- and within-subject  
266 variation in nutrient intake from infancy to old age: estimating the number of  
267 days required to rank dietary intakes with desired precision. Am J Clin Nutr;;  
268 50(1): 155-167.
- 269 23. Harland, B. (1989). Dietary Fibre and Mineral Bioavailability. Nutrition  
270 Research Reviews, 2(1), 133-147. doi:10.1079/NRR19890011.
